# Supplementary material for: Nanostructured and oriented metal–organic framework films enabling extreme surface wetting properties
Source: publisher site journal article supplement (doi:10.3762/bjnano.10.196), 2019-10-09
Supplement: Additional file 1 [file 2190-4286-10-196-S1.pdf]

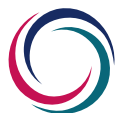

## Supporting Information

for

### **Nanostructured and oriented metal–organic framework films enabling extreme surface wetting properties**

Andre Mähringer, Julian M. Rotter and Dana D. Medina

*Beilstein J. Nanotechnol.* **2019**, *10*, 1994–2003. doi:10.3762/bjnano.10.196

## Additional experimental details

## Table of Contents

|                                                                          |            |
|--------------------------------------------------------------------------|------------|
| <b>1. Characterization</b> .....                                         | <b>S3</b>  |
| X-ray spectroscopy .....                                                 | S3         |
| Scanning electron microscopy (SEM) .....                                 | S3         |
| Contact angle measurements .....                                         | S3         |
| Atomic force microscopy (AFM) .....                                      | S3         |
| <b>2. Experimental</b> .....                                             | <b>S4</b>  |
| General .....                                                            | S4         |
| Substrates .....                                                         | S4         |
| Bulk Synthesis .....                                                     | S4         |
| Ni-CAT-1 .....                                                           | S4         |
| Co-CAT-1 .....                                                           | S5         |
| Preparation of Ni- and Co-CAT-1 pellets .....                            | S5         |
| Film formation via vapor-assisted conversion (VAC) .....                 | S5         |
| Synthesis of compact Ni- and Co-CAT-1 films on gold surfaces .....       | S5         |
| Synthesis of nanostructured Ni-CAT-1 films on gold substrates .....      | S6         |
| Synthesis of nanostructured Co-CAT-1 films on gold substrates .....      | S6         |
| Synthesis of nanostructured Ni-CAT-1 films on glass substrates .....     | S7         |
| <b>3. Characterization of the M-CAT-1 bulk material</b> .....            | <b>S8</b>  |
| PXRD and SEM analysis of Ni- and Co-CAT-1 bulk materials .....           | S8         |
| PXRD and SEM analysis of pelletized Ni- and Co-CAT-1 samples .....       | S8         |
| Water and Oil-contact angles of Ni- and Co-CAT-1 pellets in water .....  | S9         |
| Atomic force microscopy (AFM) of M-CAT-1 Pellets .....                   | S9         |
| Surface energy of M-CATs .....                                           | S10        |
| <b>4. Reference contact angle measurements</b> .....                     | <b>S13</b> |
| Contact Angle (CA) .....                                                 | S13        |
| CA measurements on gold substrates .....                                 | S13        |
| CA measurements on glass substrates .....                                | S14        |
| <b>5. Characterization of M-CAT-1 thin films</b> .....                   | <b>S15</b> |
| GIWAXS and SEM of oriented and compact Ni- and Co-CAT-1 thin films ..... | S15        |
| AFM of oriented and compact Ni- and Co-CAT thin films .....              | S16        |
| Nanostructured Ni- and Co-CAT-1 thin films on gold substrates .....      | S17        |

|          |                                                                                         |            |
|----------|-----------------------------------------------------------------------------------------|------------|
|          | Water and oil-contact angles of compact and oriented Ni-CAT-1 films .....               | S17        |
|          | Photographs of the WCA and OCA measurements.....                                        | S18        |
|          | GIWAXS and SEM analysis of nanostructured films grown on glass substrates.....          | S18        |
|          | UV-vis of nanostructured Ni-CAT-1 films grown on quartz .....                           | S19        |
|          | Impact of precursor and crystallization promotor concentration on the film growth ..... | S19        |
| <b>6</b> | <b>Anti-fog coating experiments.....</b>                                                | <b>S20</b> |
|          | Macroscopic photograph of the anti-fog coating experiment.....                          | S20        |
|          | Temperature-dependent anti-fog coating experiments .....                                | S20        |
| <b>7</b> | <b>Wetting models.....</b>                                                              | <b>S21</b> |
| <b>8</b> | <b>Stability Test .....</b>                                                             | <b>S22</b> |
|          | Ni-CAT-1 oriented and nanostructured films on gold substrates.....                      | S22        |
|          | Co-CAT-1 oriented and nanostructured films on gold substrates .....                     | S23        |
|          | Nanostructured Ni-CAT-1 films on glass substrates.....                                  | S24        |
|          | <b>References.....</b>                                                                  | <b>S24</b> |

## 1. Characterization

### X-ray spectroscopy

X-ray diffraction (XRD) analyses were performed on a *Bruker D8* diffractometer in Bragg-Brentano geometry with Ni-filtered Cu K $\alpha$  ( $\lambda = 1.54060 \text{ \AA}$ ) radiation operating at 40 kV and 30 mA with a position-sensitive detector (*LynxEye*).

Two-dimensional grazing-incident wide angle X-ray scattering (2D GIWAXS) data were collected using an *Anton-Paar SAXSpace* system equipped with a Cu K $\alpha$  microfocus source operated at 50 kV and 1 mA and an *Eiger Dectris R 1M* 2D detector.

### Scanning electron microscopy (SEM)

SEM images were recorded on a *FEI Helios NanoLab G3 UC* electron microscope with an acceleration voltage of 2 kV from a field emission gun. For the cross-section analysis substrates were partially cut and broken manually to reveal fresh cross-sections. Prior to SEM analysis the samples were coated with a thin carbon layer by carbon fiber flash evaporation in high vacuum.

### Contact angle measurements

Contact-angle measurements were performed on an *attension* from *Biolin Scientific*. A droplet with the sessile drop method. A droplet of liquid was placed on the substrate, while recording images with 1 fps for 10s, while the dynamic measurements (self-cleaning surfaces) were recorded with 3 fps for 10 s. The image analysis was carried out with the software *ImageJ* using the manual mode and fitting the contour of the droplets manually.

### Atomic force microscopy (AFM)

AFM measurements were performed using a *NANOINK* atomic force microscope in tapping mode with a scanning rate of 0.2 Hz, a proportional gain of 50 and an integral gain of 32. The scanned area was  $5.02 \times 5.02 \text{ \mu m}$  at  $282 \times 282$  pixels.

## 2. Experimental

### General

All materials were purchased from *Sigma Aldrich*, *Acros* or *TCI Europe* in the common purities *purum*, *puriss* or *reagent grade*. The materials were used as received without additional purification and handled in air unless otherwise noted.

The water utilized in the synthesis was subjected to a *Merck-Milipore Mili-Q* purification system prior to use.

### Substrates

Analogous as described in [S1]. The preparation of the gold substrates was based on the procedure described by Hinterholzinger *et al.* Seven microscope glass slides (*Menzel*, 76 mm x 26 mm) in a support made of Teflon were cleaned by ultrasonic treatment in acetone, followed by sequential washing steps with 2-propanol, a 1:100 mixture of *Hellmanex III* and water, and finally 2-propanol (*Chromasolv*). Oxygen plasma cleaning (*Diener electronic*, Plasma-Surface-Technology) for 30 min was conducted, previous to the mounting of the glass slides in a vacuum deposition unit installed in a glove box (*MBraun Labmaster Pro SP* equipped with an *Inficon SQC-310C Deposition controller*). 10 nm of titanium and 40 nm of gold were thermally deposited under high vacuum onto the microscope glass slides.

The respective substrates were prepared by cutting commercially available microscope slides (*Menzel*, 76 mm x 26 mm), gold coated glass slides into pieces of 1.2 cm x 1.0 cm and 2.5 cm x 2.5 cm.

### Bulk Synthesis

#### Ni-CAT-1

Analogous as described in [S1]. In a 5 mL culture tube, a solid mixture of 2,3,6,7,10,11-hexahydroxytriphenylene (0.0107 mmol, 3.5 mg) and nickel(II) acetate tetrahydrate (0.0201 mmol, 5 mg) was suspended in 1 mL 1-propanol and 1 mL distilled water (1:1 v:v). The loading of the culture tube was carried out under ambient atmosphere and the resulting blue solution was sonicated for 10 s at maximum power. Subsequently, the culture tube was tightly capped and heated at 85 °C for 18 h in a preheated oven. The resulting black solution was washed

three times with 10 mL dry acetone and isolated by centrifugation. The obtained dark blue microcrystalline product was dried under dynamic vacuum prior to analysis.

### **Co-CAT-1**

Analogous as described in [S1]. In a 5 mL culture tube, a solid mixture of 2,3,6,7,10,11-hexahydroxytriphenylene (0.0107 mmol, 3.5 mg) and cobalt(II) acetate tetrahydrate (0.0207 mmol, 5 mg) was suspended in 1 mL of 1-propanol and 1 mL of distilled water (1:1 v:v). The loading of the culture tube was carried out under ambient atmosphere and the resulting blue solution was sonicated for 10 s at maximum power. Subsequently, the culture tube was tightly capped and heated at 85 °C for 18 h in a preheated oven. The resulting black solution was washed three times with 10 mL of dry acetone and isolated by centrifugation. The obtained dark blue microcrystalline product was dried under dynamic vacuum prior to analysis.

### **Preparation of Ni- and Co-CAT-1 pellets**

Analogous as described in [S1]. Ni- (110.5 mg) and Co- (95.8 mg) CAT-1 pellets (obtained from several of the above described batches) for electrical conductivity measurements were fabricated with a standard Paul-Weber KBr Press.

### **Film formation via vapor-assisted conversion (VAC)**

Analogous as described in [S1]. For the film formation using VAC, a glass bottle (*Schott Duran*, borosilicate 3.3, *ISO4796*, 100 mL) with a *PBT* cap equipped with a Teflon seal was used. The bottom part of the bottle was filled with 14 *Raschig*-rings (10 mm x 10 mm, soda-lime glass) to obtain an elevated flat platform for the substrate. A mixture of water and 1-propanol was filled into the bottle. Afterwards, a substrate (1.2 cm x 1 cm) was placed on top of the *Raschig*-rings and fully coated with a liquid layer of a freshly prepared MOF precursor solution. The bottle was closed and transferred into a preheated oven where it was kept for the specified time. Afterwards, the autoclave was removed from the oven and cooled down for 10 min before the substrate was rinsed with dry acetone.

### **Synthesis of compact Ni- and Co-CAT-1 films on gold surfaces**

Analogous as described in [S1]. The HHTP precursor ( $2.69 \times 10^{-3}$  mmol; 0.875 mg) and the metal precursors nickel acetate ( $5.0 \times 10^{-3}$  mmol; 1.25 mg), cobalt acetate ( $5.0 \times 10^{-3}$  mmol; 1.25 mg) or copper trifluoroacetylacetonate ( $5.0 \times 10^{-3}$  mmol; 1.25 mg) were mixed in a

defined ratio (1:2) and dissolved in a solvent mixture of water and 1-propanol (1.5 mL : 1.5 mL) by sonication for 20 s at maximum power. The obtained precursor solution was filtered through a syringe filter to remove any remaining particles. Subsequent, 40  $\mu$ L of the solution (HHTP: 0.899 mmol L<sup>-1</sup>; MOAc: 1.674 mmol L<sup>-1</sup>) were deposited onto a clean 1.2 x 1.0 cm gold substrate. Four of these set-ups were placed onto glass spacers in an autoclave loaded with a solvent mixture of water and 1-propanol (2.5 mL : 2.5 mL). The autoclave was sealed immediately and placed into a preheated oven at 85 °C for 3.5 h. The experimental set-up of the VAC is shown in Fig. S2.1. Afterwards, the autoclave was removed from the oven and cooled down for 10 min before the substrate was rinsed with dry acetone.

### **Synthesis of nanostructured Ni-CAT-1 films on gold substrates**

The precursor solution was prepared by providing a hexahydroxytriphenylene (HHTP) precursor ( $5.4 \times 10^{-3}$  mmol; 1.75 mg) as the organic building blocks and nickel acetate ( $10 \times 10^{-3}$  mmol; 2.5 mg) as the metallic precursor in a defined ratio (1:2 n:n) and dissolving them in a solvent mixture of water and 1-propanol (1 mL : 1 mL) with the addition of a modulator acetic acid (50  $\mu$ L). 40  $\mu$ L of the respective precursor solution (HHTP: 2.75 mmol L<sup>-1</sup>; NiAc: 5 mmol L<sup>-1</sup>; HOAc: 0.41 mol L<sup>-1</sup>) was dropcasted onto the surface of a clean 1.2 x 1.0 cm gold coated glass substrate. Four of such substrates, each carrying a thin layer of precursor solution, were placed onto glass spacers as substrate holders in an autoclave partly filled with a solvent bath consisting of water and 1-propanol (2.5 mL : 2.5 mL). The autoclave was sealed immediately and placed into a preheated oven at 85°C for 12 hours. Afterwards, the autoclave was removed from the oven and cooled down for 10 min, before the substrates were rinsed with dry acetone.

### **Synthesis of nanostructured Co-CAT-1 films on gold substrates**

The precursor solution was prepared by providing an HHTP precursor ( $5.4 \times 10^{-3}$  mmol; 1.75 mg) as the organic building blocks and cobalt acetate ( $11.0 \times 10^{-3}$  mmol; 3 mg) as the metallic precursors in a defined ratio (1:2 n:n) and dissolving them in a solvent mixture of water, 1-propanol (1 mL : 1 mL) with addition of 50  $\mu$ L of a water, 1-propanol solution (1 mL : 1 mL) containing salicylic acid as a modulator (0.89 mmol; 125 mg). 40  $\mu$ L of the respective precursor solution (HHTP: 2.75 mmol L<sup>-1</sup>; CoAc: 6 mmol L<sup>-1</sup>; salicylic acid: 0.01 mmol L<sup>-1</sup>) was dropcasted onto a clean 1.2 x 1.0 cm gold coated substrate. Four of such substrates, each carrying a thin

layer of precursor solution, were placed onto glass spacers as substrate holders in an autoclave partly filled with a solvent bath consisting of water and 1-propanol (2.5 mL : 2.5 mL). The autoclave was sealed immediately and placed into a preheated oven at 85°C for 12 h. Afterwards, the autoclave was removed from the oven and cooled down for 10 min, before the substrates were rinsed with dry acetone.

### **Synthesis of nanostructured Ni-CAT-1 films on glass substrates**

Analogous as described in [S1]. The HHTP precursor ( $5.4 \times 10^{-3}$  mmol; 1.75 mg) and the nickel acetate ( $10.0 \times 10^{-3}$  mmol; 2.5 mg) were mixed in a defined ratio (1:2) and dissolved in a solvent mixture of water and 1-propanol (1 mL : 1 mL) with the addition of the modulator acetic acid (50  $\mu$ L). 100  $\mu$ L of the respective precursor solution (HHTP: 2.75 mmol L<sup>-1</sup>; NiAc: 6 mmol L<sup>-1</sup>; HOAc: 0.41 mol L<sup>-1</sup>) were deposited onto a clean 2.5 x 2.5 cm glass substrate. One of this set-ups was placed onto glass spacers in an autoclave loaded with a solvent mixture of water and 1-propanol (2.5 mL : 2.5 mL). The autoclave was sealed immediately and placed into a preheated oven at 85°C for 18 h. Afterwards, the autoclave was removed from the oven and cooled down for 10 min before the substrates were rinsed with dry acetone.



### 3. Characterization of the M-CAT-1 bulk material

#### PXRD and SEM analysis of Ni- and Co-CAT-1 bulk materials

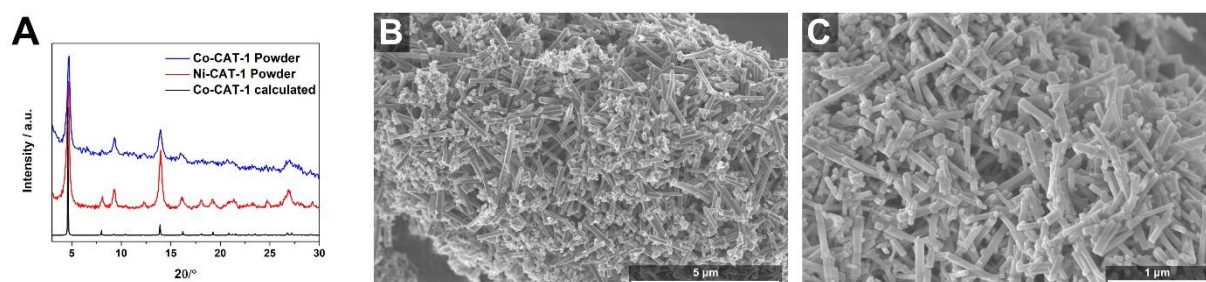

**Figure S3.1** A) PXRD pattern of the Ni- and Co-CAT-1 (red and blue) powders compared to the calculated Co-CAT-1 pattern (black). B) and C) show the needle-like bulk morphology of the Ni- and Co-CAT-1 crystal, respectively.

#### PXRD and SEM analysis of pelletized Ni- and Co-CAT-1 samples

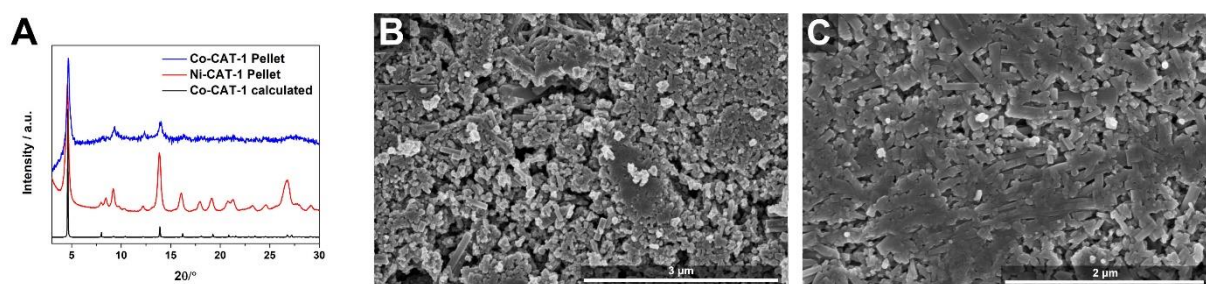

**Figure S3.2** A) PXRD pattern of the Ni- and Co-CAT-1 (red and blue) pelletized materials compared to the calculated Co-CAT-1 pattern (black). B) and C) show the dense needle-like bulk surface of the Ni- and Co-CAT-1 pelletized samples, respectively.

### Water and Oil-contact angles of Ni- and Co-CAT-1 pellets in water

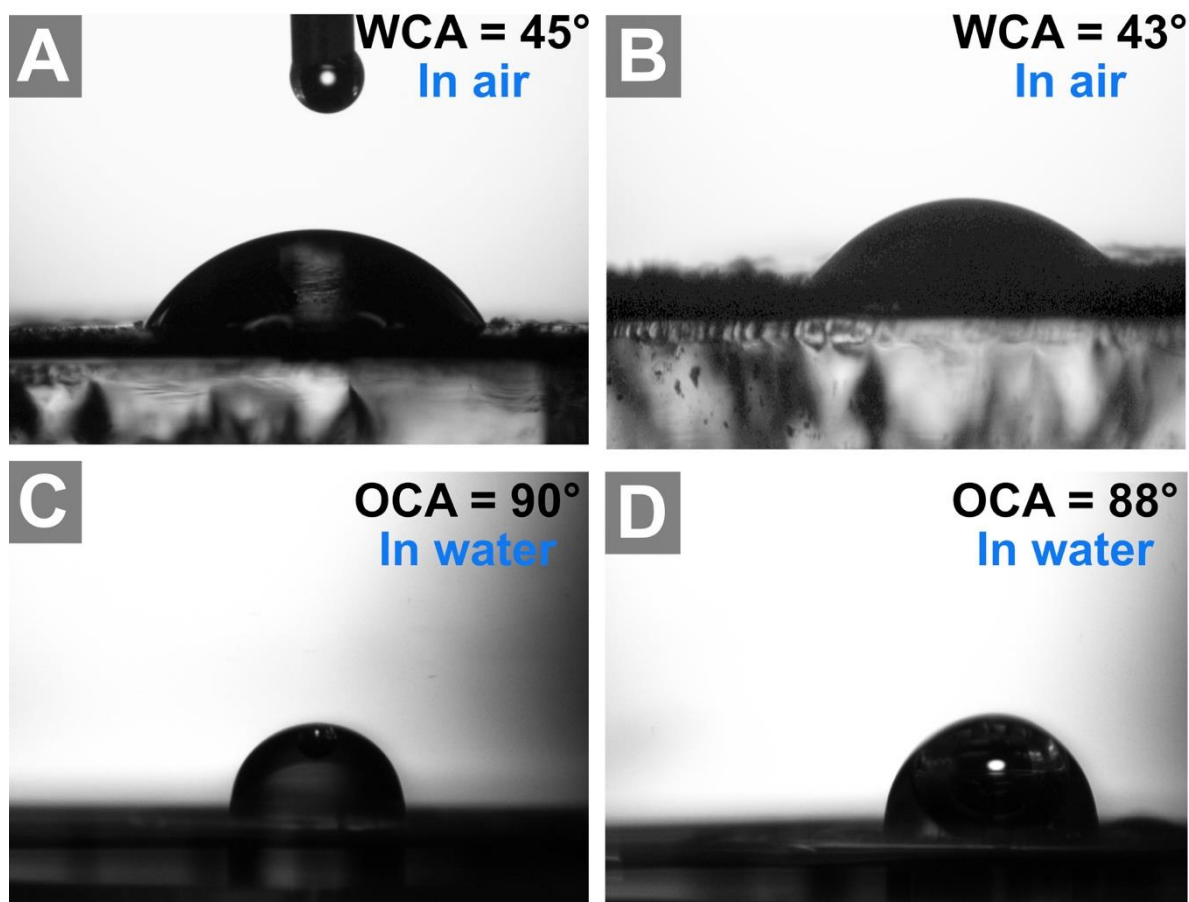

**Figure S3.3** A) and B) Water contact angle of Ni- and Co-CAT-1 pellet samples in air, respectively. C) and D) underwater dichloromethane contact angle of Ni- and Co-CAT-1 pellet samples, respectively.

### Atomic force microscopy (AFM) of M-CAT-1 Pellets

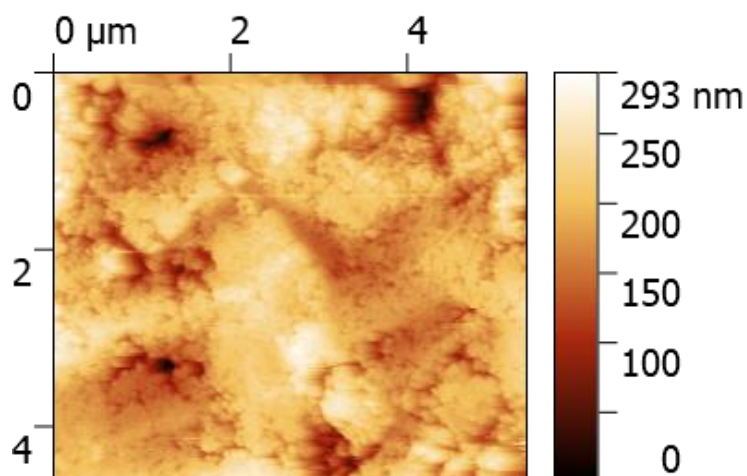

**Figure S3.4** AFM topographic measurement of a Ni-CAT-1 pelletized sample (4.5 μm x 4.7 μm). The surface roughness values were calculated to be 37 nm ( $R_{ms}$ ).

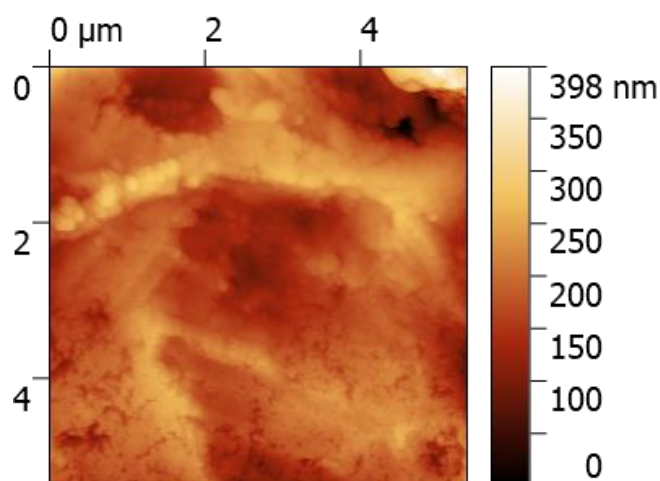

**Figure S3.5** AFM topographic measurement of a Co-CAT-1 pelletized sample (4.5  $\mu\text{m}$  x 4.7  $\mu\text{m}$ ). The surface roughness values were calculated to be 44 nm ( $R_{\text{ms}}$ ).

### Surface energy of M-CATs

The wetting properties of the M-CAT-1 were estimated by the following procedure. First, M-CAT-1 bulk materials were prepared according to a literature procedure. Subsequently, the obtained microcrystalline powders were pressed to pelletized samples (1 cm diameter, thicknesses 500  $\mu\text{m}$ ; 100 mg material). The samples exhibit an even surface composed of densely packed and randomly oriented crystallites. This was confirmed by scanning-electron microscopy (SEM) and X-ray diffraction (XRD) analysis and atomic force microscopy (AFM). On the as-prepared pelletized samples we performed contact angle (CA) measurements to estimate the free solid surface energy, especially the dispersive and polar components. The free surface energy of a solid cannot be directly measured, but it can be calculated from a set of steady state liquid/solid contact angles. Therefore, we used a common method for estimating the free surface energy, the *Fowkes theory*. This theory describes the surface energy of a solid as composed of a dispersive component, and “non”-dispersive part (polar). It is therefore based on the *Young’s* equation and the *Dupre’s* definition of adhesion energy showing that the adhesive energy between a solid and a liquid can be separated into dispersive interactions and the non-dispersive (polar) interactions between the two phases. These two energy expressions *e.g.* *Young’s* and the *Dupre’s* equations can be combined to yield the *Fowkes’* surface energy equation:

$$(\sigma_L^D)^{1/2}(\sigma_S^D)^{1/2} + (\sigma_L^P)^{1/2}(\sigma_S^P)^{1/2} = \frac{\sigma_L(\cos\theta + 1)}{2} \quad (1)$$

with  $\sigma_L^D$ =surface tension liquid (dispersive),  $\sigma_L^P$  = surface tension liquid (polar),  $\sigma_S^D$  = surface free energy solid (dispersive),  $\sigma_S^P$  = free surface energy of the solid (polar),  $\sigma_L$  = overall surface tension liquid,  $\theta$  = measured contact angle at the liquid/solid interface. In order to determine the surface energy, we tested the solid surface using a liquid which exhibits only a dispersive component to its overall surface tension ( $\sigma_L = \sigma_L^D = 50.8$  mN/m) featuring a high surface tension, hence diiodmethane ( $\sigma_L^P=0$ ) was the solvent of choice. Straightforwardly, eq. (1) can be expressed as:

$$\sigma_S^D = \frac{\sigma_L(\cos\theta + 1)^2}{4} \quad (2)$$

$\sigma_S^D$  can be directly determined from the measured CA of diiodmethane. In the next step, we proceeded with measuring the CA of distilled water showing one polar and one dispersive component to its overall surface tension ( $\sigma_L^P = 46.4$  mN/m, and  $\sigma_L^D = 26.4$  mN/m). Knowing these components, we calculated  $\sigma_S^P$  as the only unknown parameter in eq. (1). By adding the dispersive and the polar components of the solid, we finally obtained the  $\sigma_S$  overall surface energy of the M-CAT-1 materials (equation 3).

$$\sigma_S^D + \sigma_S^P = \sigma_S \quad (3)$$

**Table S1.** Overall surface energies ( $\sigma_s$ ) and the respective dispersive ( $\sigma_s^D$ ) and polar component ( $\sigma_s^P$ ) estimated for Ni- and Co-CAT-1 oriented and compact films (OCF) and oriented and nanostructured films (ONF).

| M-CAT-1       | $\sigma_s$ [mN / m] | $\sigma_s^D$ [mN/m] | $\sigma_s^P$ [mN/m] |
|---------------|---------------------|---------------------|---------------------|
| Ni-CAT-1(OCF) | 71.3                | 50.8                | 20.4                |
| Co-CAT-1(OCF) | 73.6                | 50.8                | 22.8                |
| Ni-CAT-1(ONF) | 79.5                | 50.8                | 28.5                |
| Co-CAT-1(ONF) | 79.5                | 50.8                | 28.5                |

## 4. Reference contact angle measurements

### Contact Angle (CA)

The contact angle (CA) describes the measured angle between a liquid-vapor interface in direct contact with a solid surface. From the obtained CA the wettability of the solid surface can be analyzed.

### CA measurements on gold substrates

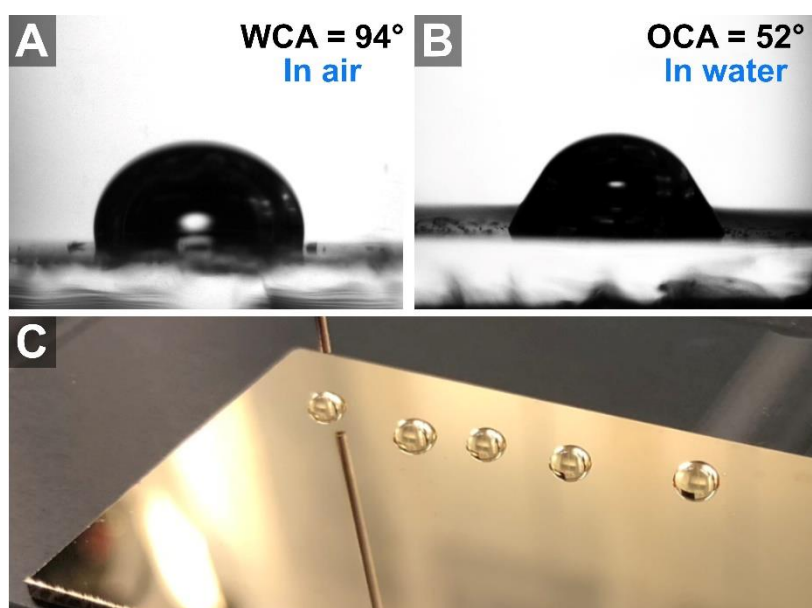

**Figure S4.1** **A)** CA measurements of a bare gold surface (right after deposition) in air. **B)** OCA measurements of a bare gold surface in water with dichloromethane as an oil test liquid **C)** Macroscopic photographs of water droplets on a bare gold surface used for WCA measurements in air.

## CA measurements on glass substrates

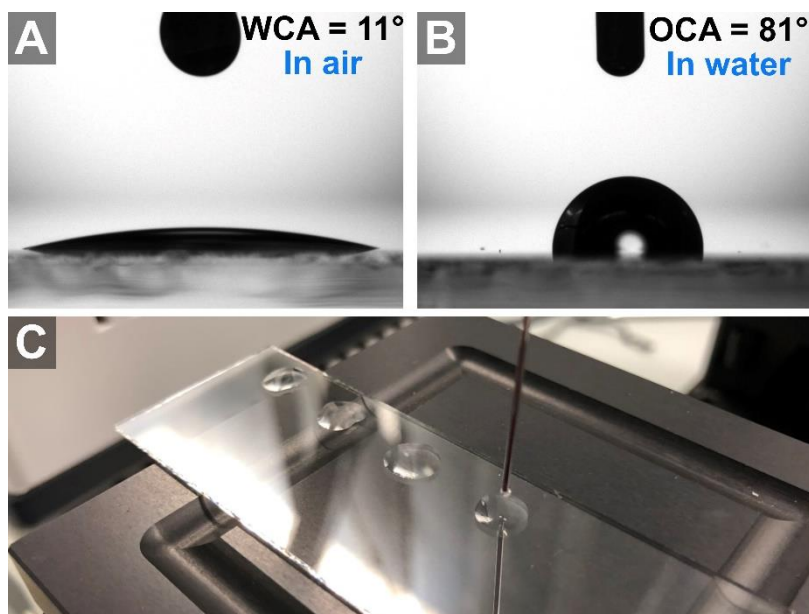

**Figure S4.2** A) WCA on a bare glass surface in air. B) Under water OCA of dichloromethane droplet on a bare glass surface C) Macroscopic photographs of water droplets placed on a bare glass surface in air.

## 5. Characterization of M-CAT-1 thin films

### GIWAXS and SEM of oriented and compact Ni- and Co-CAT-1 thin films

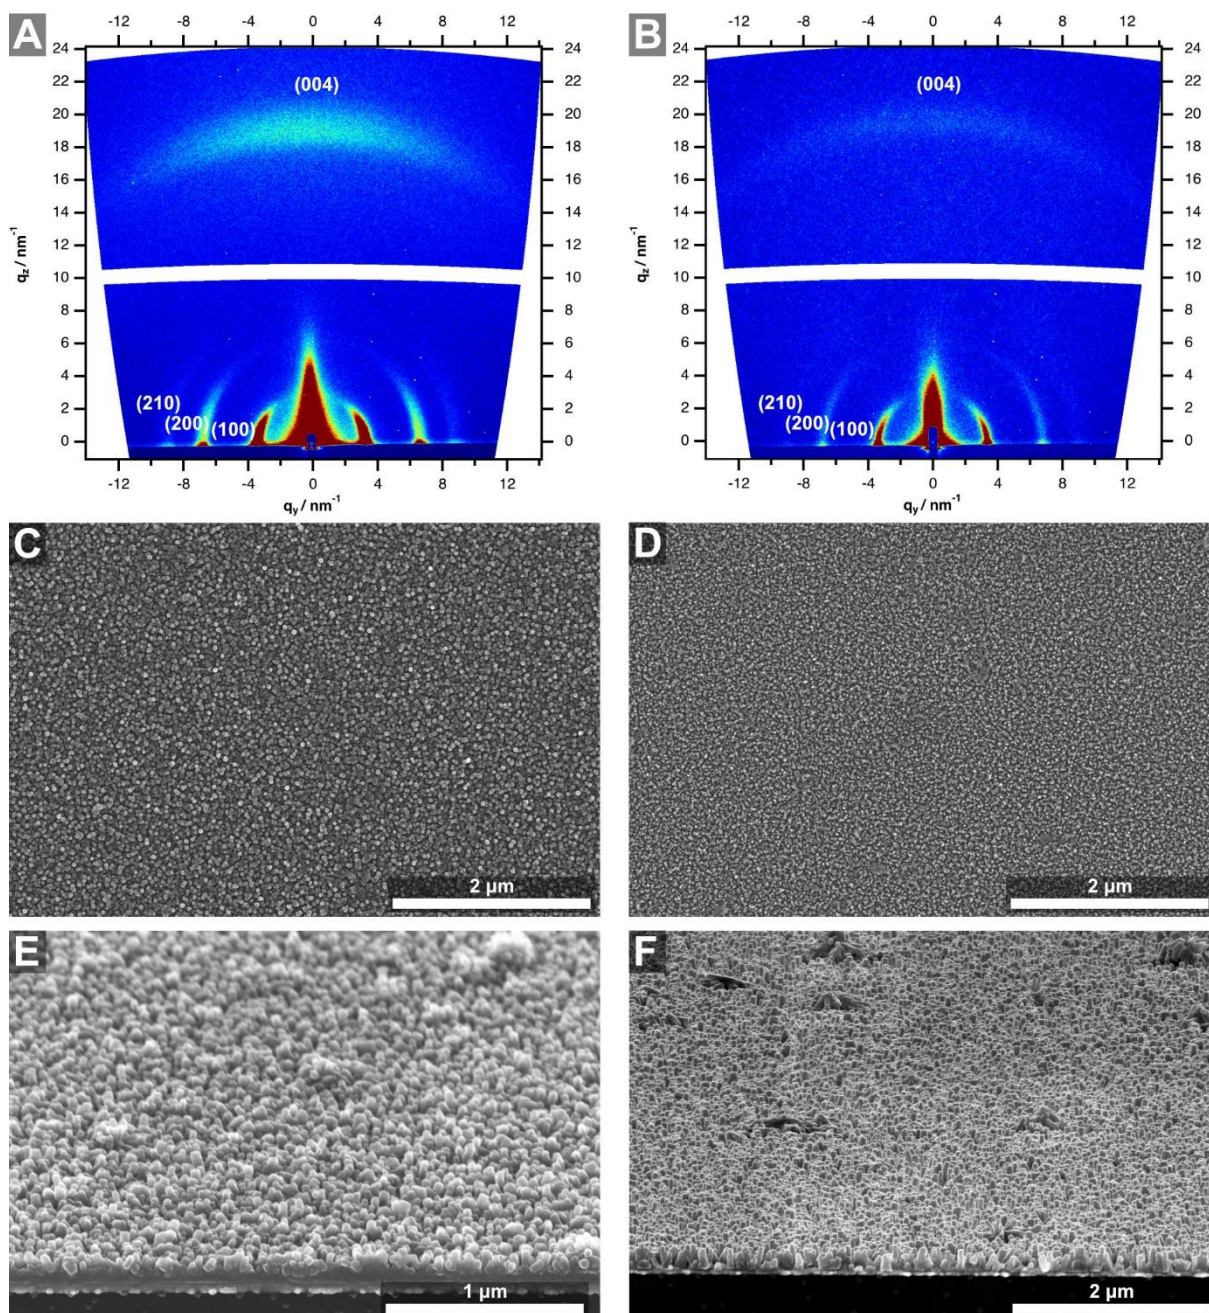

**Figure S5.1** A), C) and E) Depict a the GIWAXS measurement of an oriented and compact Ni-CAT-1 film on gold, top-view SEM and 30° tilted SEM cross-section images of the same sample, respectively. B), D) and F) Depict a GIWAXS measurement of an oriented and compact Co-CAT-1 film on gold, top-view SEM and 30° tilted SEM cross-section images of the same sample, respectively



## AFM of oriented and compact Ni- and Co-CAT thin films

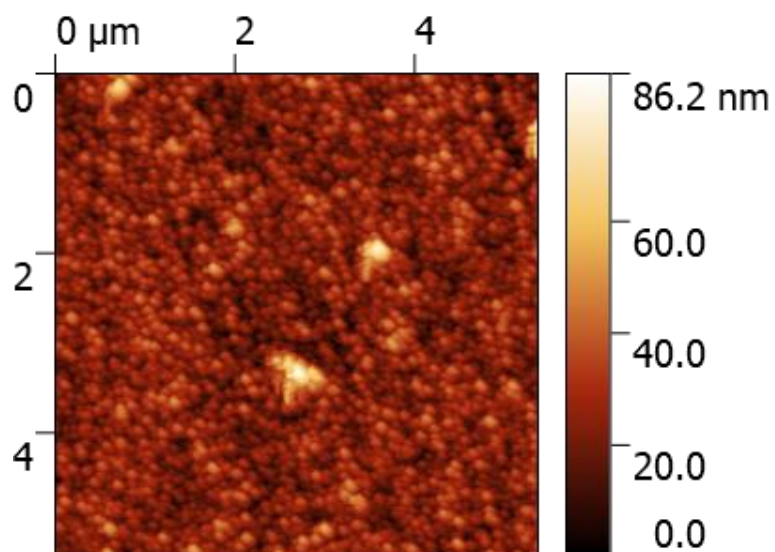

**Figure S5.2** Atomic force microscopy topographic image of a of an oriented and compact Ni-CAT-1 thin film (4.5  $\mu\text{m}$  x 4.7  $\mu\text{m}$  area). Measured roughness (Rms) of 10.2 nm.

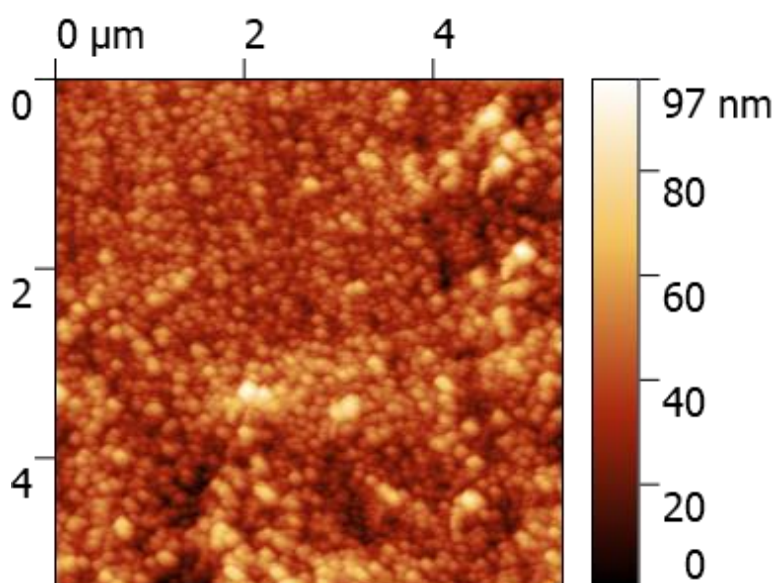

**Figure S5.3.** Atomic force microscopy topographic image of a area of an oriented and compact Co-CAT-1 film (4.5  $\mu\text{m}$  x 4.7  $\mu\text{m}$ ). Measured roughness Rms of 14.1 nm.

## Nanostructured Ni- and Co-CAT-1 thin films on gold substrates

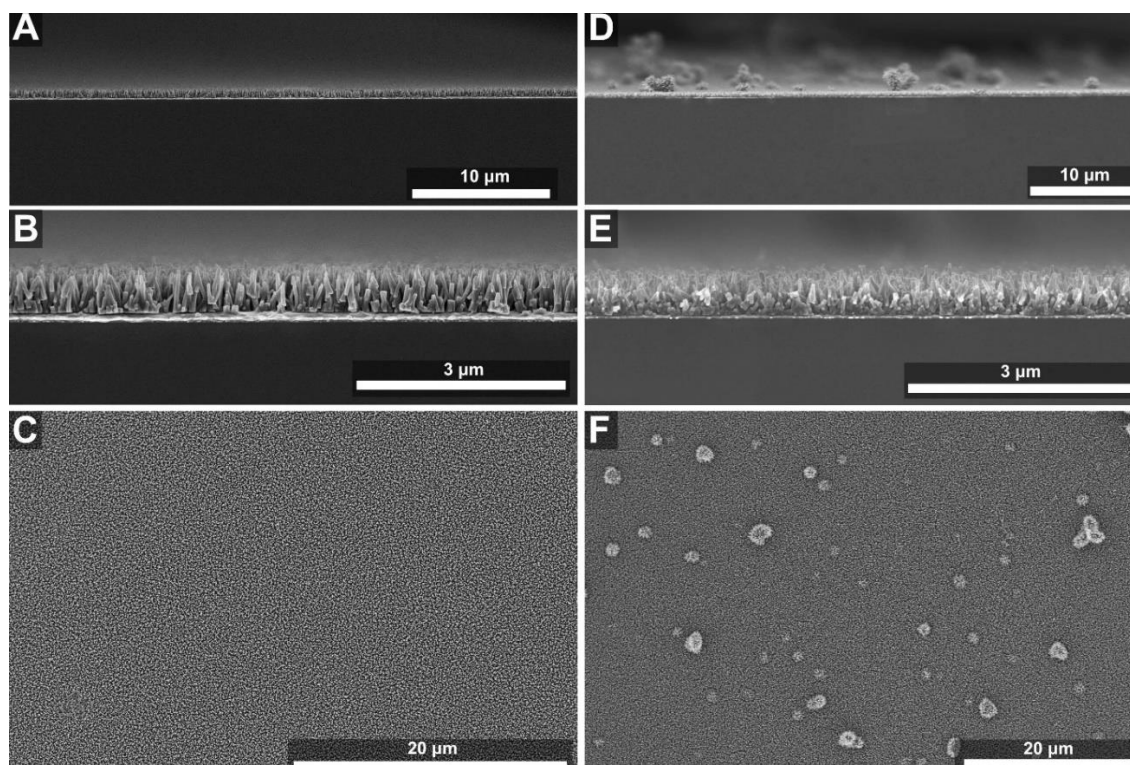

**Figure S5.4** A), B) and C) Depict the cross-section, a magnified cross-section image, and a top-view micrograph of Co-CAT-1 grown on gold as a nanostructured film, respectively. D), E) and F) Depict the cross-section, a magnified cross-section image, and a top-view micrograph of Ni-CAT-1 grown on gold as a nanostructured film, respectively.

## Water and oil-contact angles of compact and oriented Ni-CAT-1 films

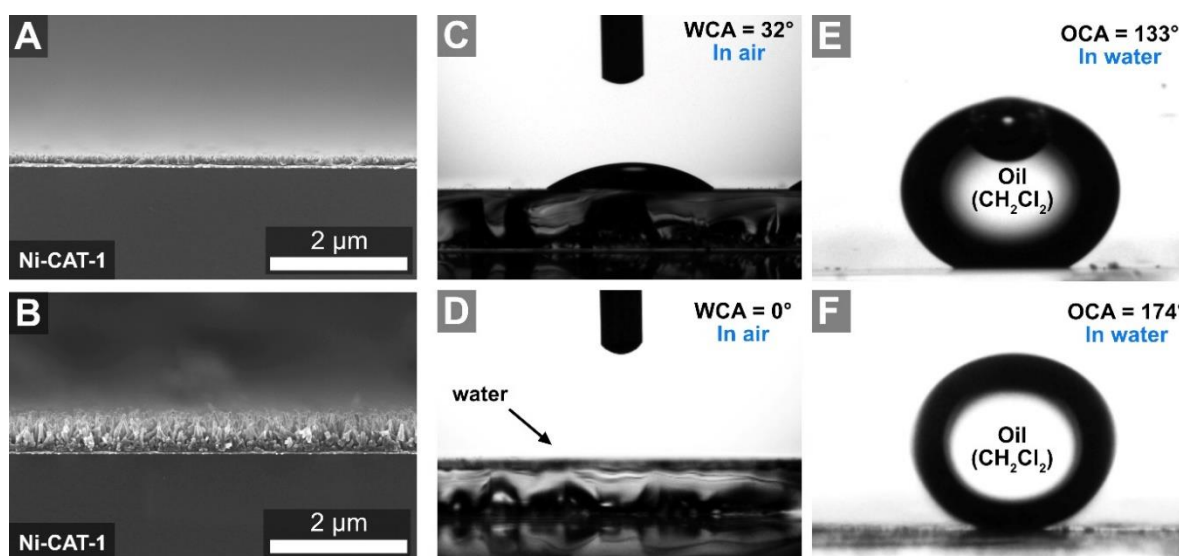

**Figure S5.5** Cross-section SEM micrographs of A) an oriented and compact Ni-CAT-1 film and B) an oriented (pillar-like) nanostructured Ni-CAT-1 film. C) and D) WCA obtained for the compact (WCA = 32°) and the nanostructured (WCA = 0°) films, respectively. E) and F) Underwater OCA obtained for the compact (CA = 133°) and the nanostructured film (CA = 173°) with dichloromethane (DCM), respectively.

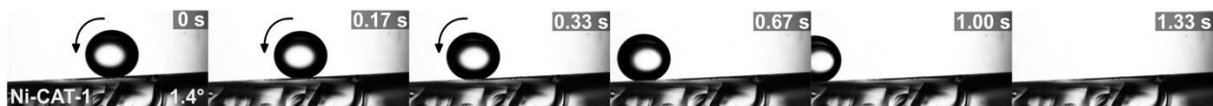

**Figure S5.6** An image series of a self-cleaning surface experiment (3 fps) with DCM as an oil droplet placed on a tilted nanostructured Ni-CAT-1 film (tilt angle of 1.4°).

### Photographs of the WCA and OCA measurements

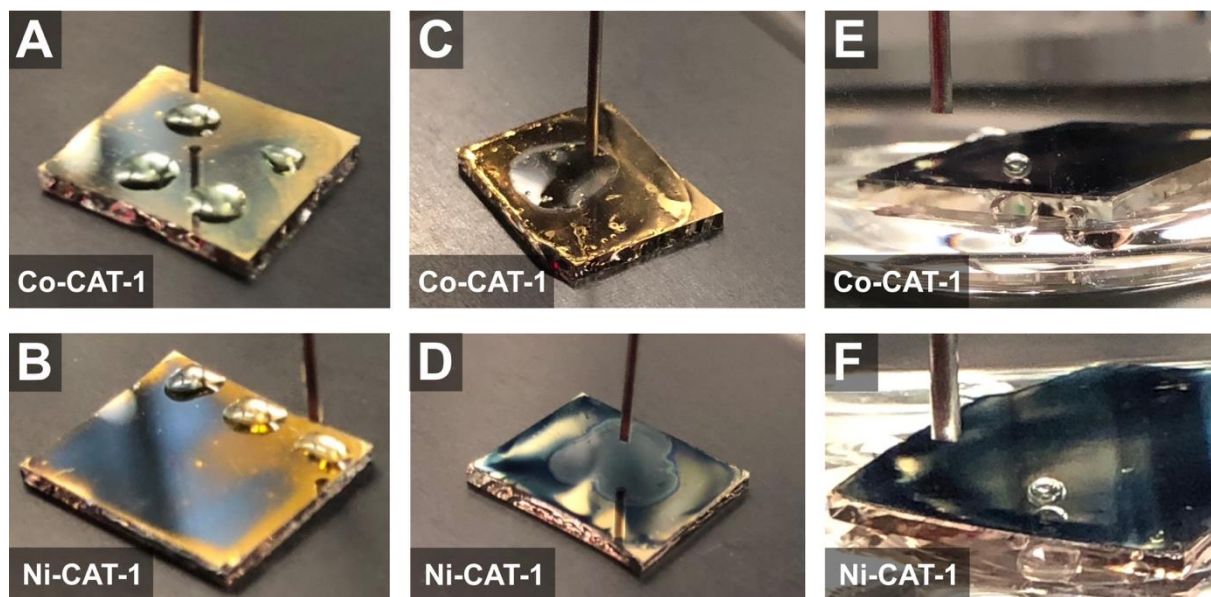

**Figure S5.7** **A)** and **B)** Macroscopic macrographs of the WCA experiments on compact Co- and Ni-CAT-1 films. **C)** and **D)** WCA experiments on nanostructured Co- and Ni-CAT-1 films in water. **E)** and **F)** OCA experiments on nanostructured Co- and Ni-CAT-1 films in water.

### GIWAXS and SEM analysis of nanostructured films grown on glass substrates

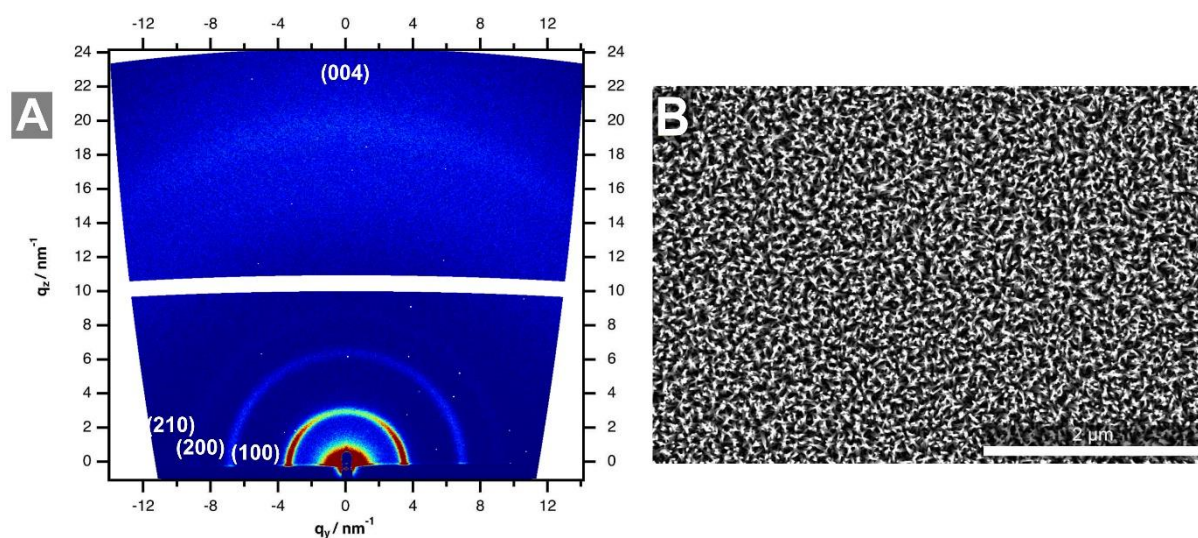

**Figure S5.8** **A)** GIWAXS pattern of a Ni-CAT-1 film featuring preferred crystal orientation on a glass substrate. **B)** Corresponding top-view SEM micrograph of the film.

### UV-vis of nanostructured Ni-CAT-1 films grown on quartz

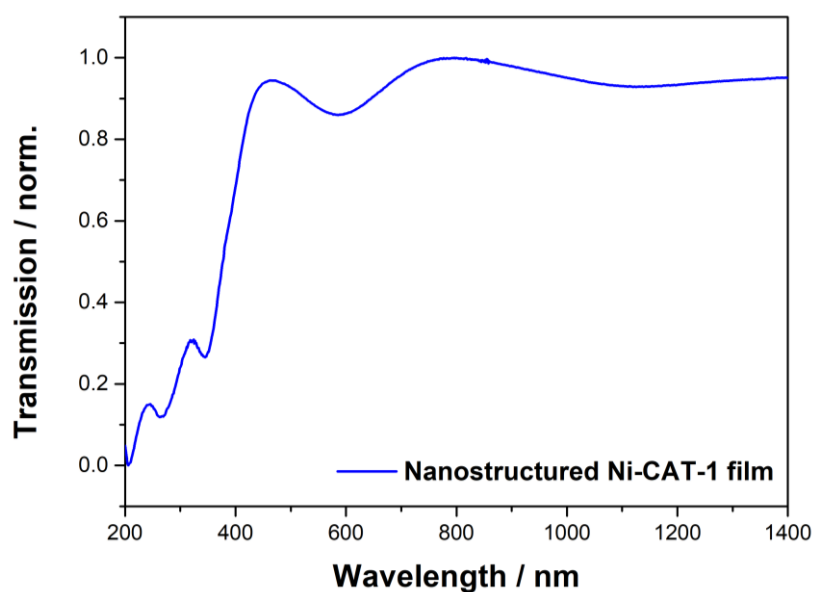

**Figure S5.9** Transmission UV-vis spectrum of Ni-CAT-1 film grown on a quartz substrate. The material exhibits a strong absorbance with an onset at 425 nm.

### Impact of precursor and crystallization promotor concentration on the film growth

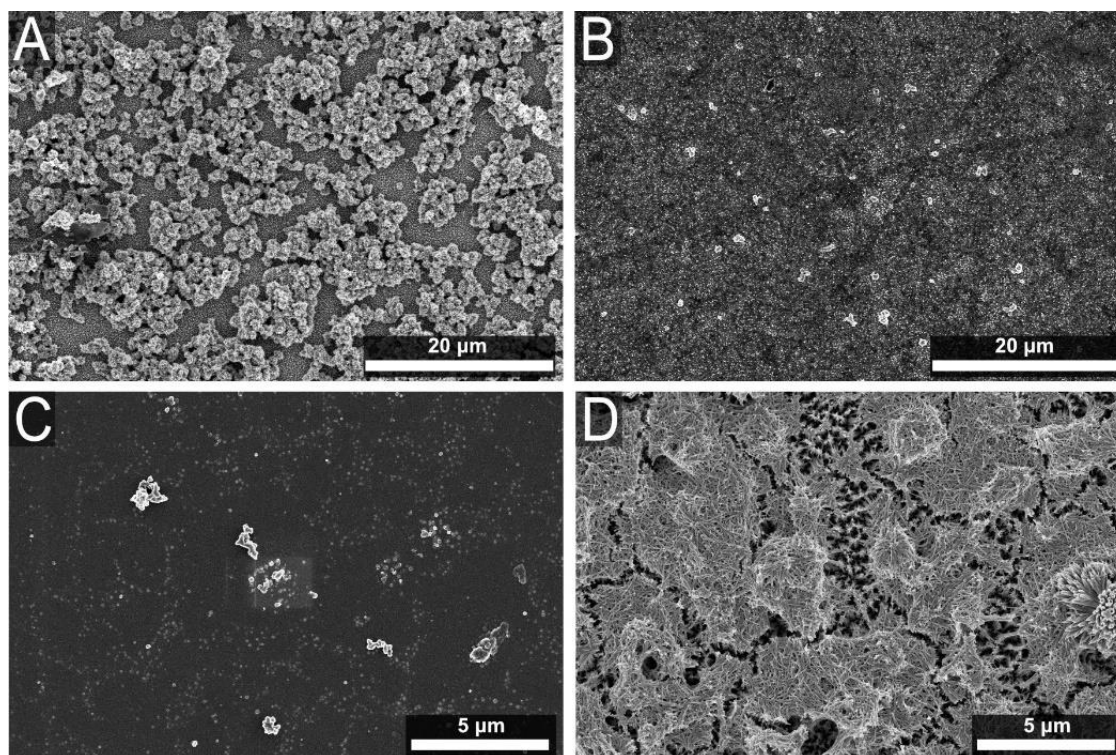

**Figure S5.10** Reducing the concentration of the crystallization promotor with respect to the optimal conditions led to uncontrolled formation of bulk material on top of the film (A). A higher concentration of the additive led to the formation of an amorphous phase (B). Reducing the precursor material concentration led to the formation of an amorphous material precipitation on the surface (C), while higher concentrations led to the precipitation of residual powder on the MOF film (D).

## 6 Anti-fog coating experiments

### Macroscopic photograph of the anti-fog coating experiment

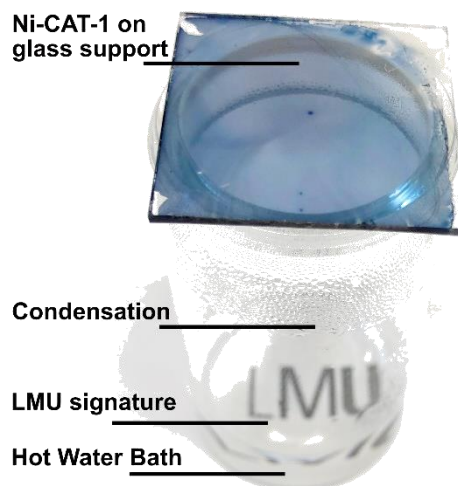

**Figure S6.1** In a glass vessel a hot water bath is provided. The hot steam rising from the hot water reservoir is condensing on the upper part of the glass vessel, while the Ni-CAT-1 coated glass support remains free of water droplets. Therefore, vision through the glass support is enabled.

### Temperature-dependent anti-fog coating experiments

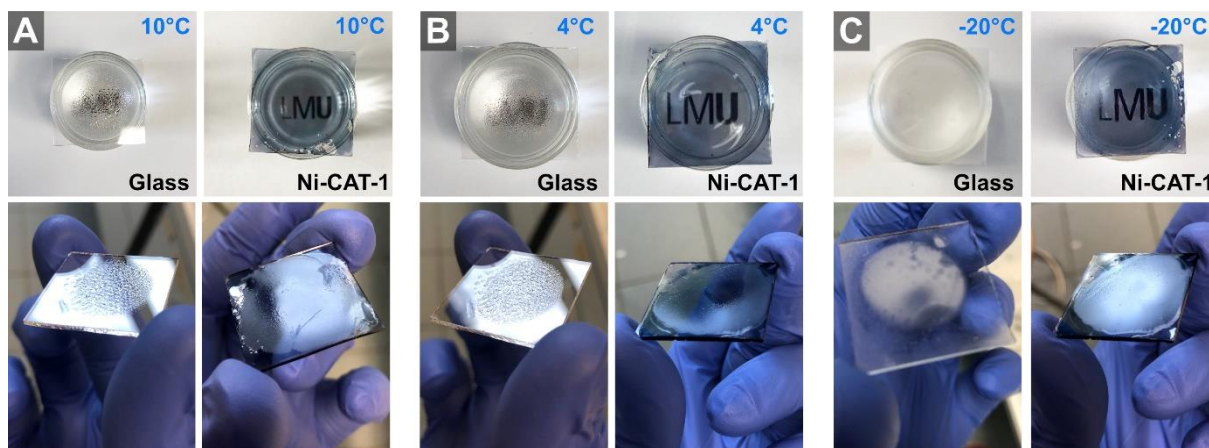

**Figure S6.2** Temperature-dependent anti-fog experiment series. Here, glass reference and the Ni-CAT-1 film on glass were cooled down to temperature of 10 °C, 4 °C and -20 °C. After cooling, the substrates were placed on top of the hot water reservoir. It can be seen that in all cases the hot vapor steam is not condensing on the Ni-CAT-1 glass supported samples.

## 7 Wetting models

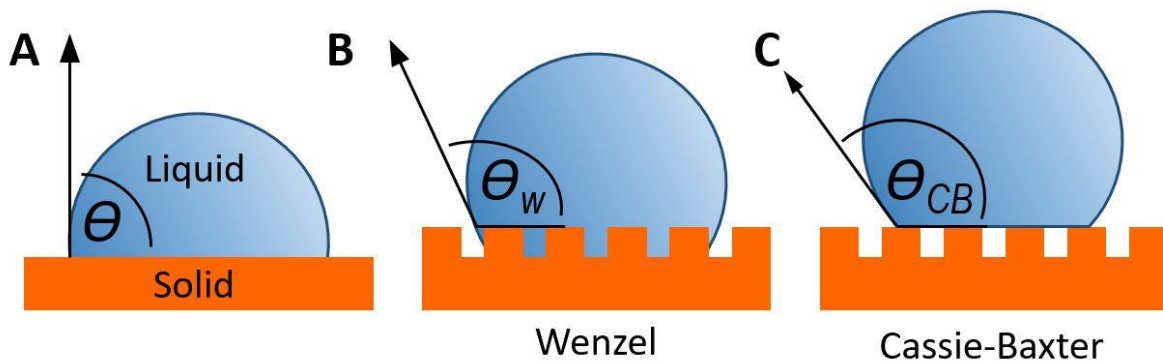

**Figure S7.1** A Scheme of possible wetting models for a liquid of a structured solid surface. **A)** Displays the wetting angle  $\theta$  of a theoretical flat surface. **B)** The change of the wetting angle to  $\theta_w$  according to the Wenzel equation:  $\cos\theta_w = r \cdot \cos\theta$ . In this model, the structuring of the solid enhances the inherent existing wetting properties of the surface. The liquid is homogeneously wetting the surface. **C)** a Cassie and Baxter description of the contact angle  $\theta_{CB}$  referring to a heterogeneous wetting of the surface by interacting solely with the elevated structured surface.

## 8 Stability Test

### Ni-CAT-1 oriented and nanostructured films on gold substrates

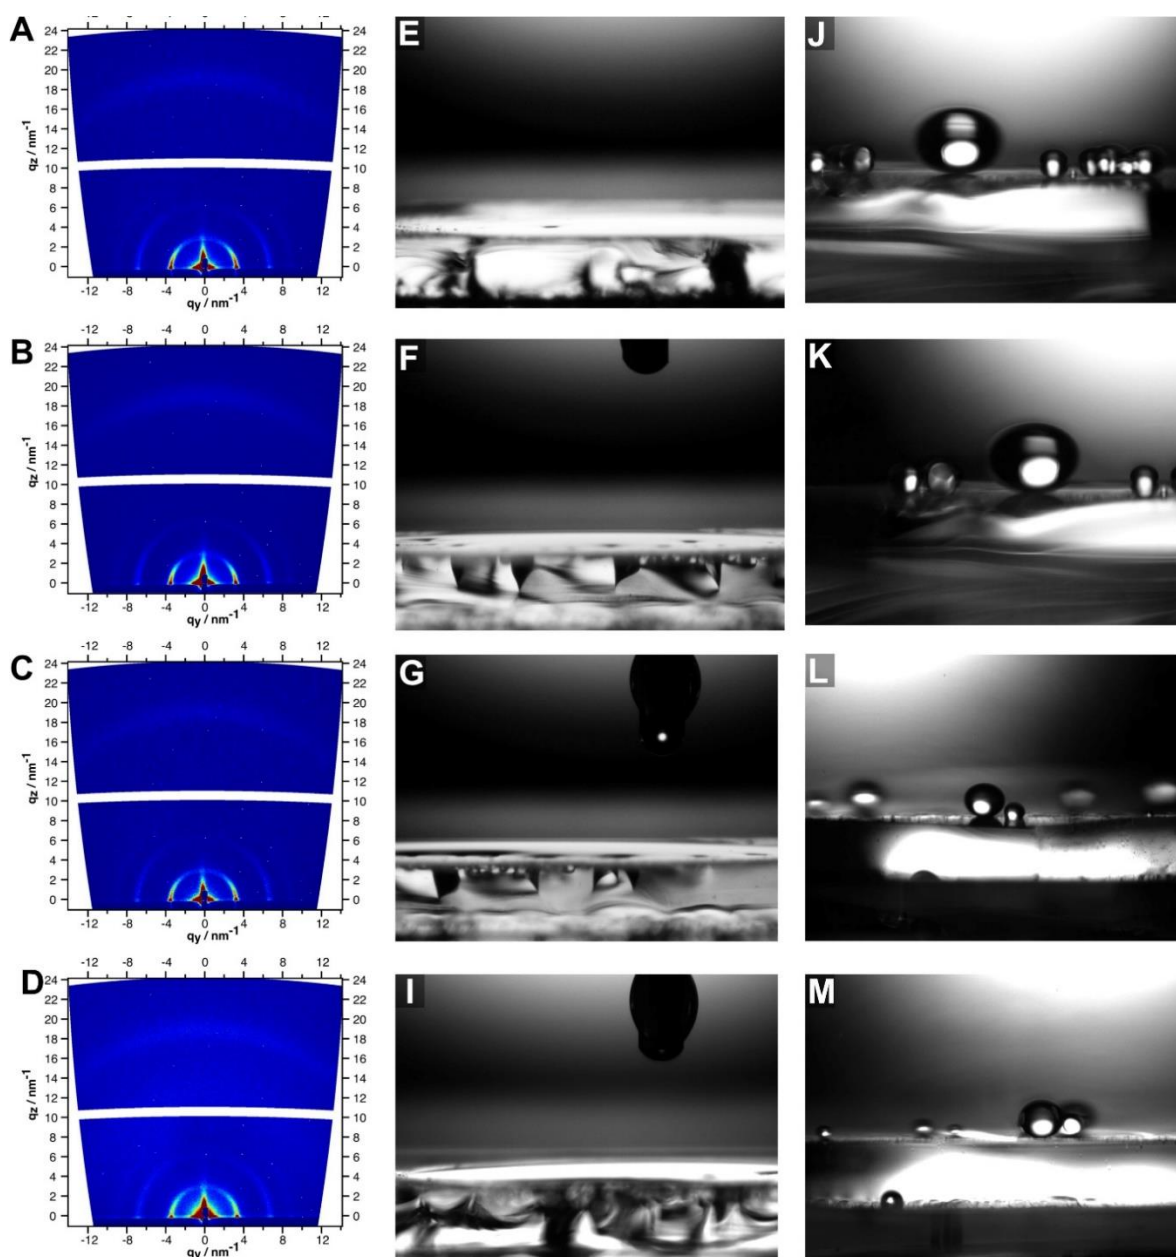

**Figure S8.1** A), B), C) and D) GIWAXS patterns of nanostructured Ni-CAT-1 thin films on gold substrates after immersion in an acidic (hydrochloric acid) aqua solution (pH 5, 12 h), basic (sodium hydroxide) aqua solution (pH 9, 12 h), exposure to high temperatures (150 °C, 12 h), and mechanical impact (sonication in a water bath, 20 min), respectively. E), F), G) and H) WCA of Ni-CAT-1 nanostructured thin films after immersion in an acidic (hydrochloric acid) aqua solution (pH 5, 12 h), in basic (sodium hydroxide) aqua solution (pH 9, 12 h), exposure to high temperatures (150 °C, 12 h), and mechanical impact (sonication in a water bath, 20min), respectively. J), K), L) and M) OCA of Ni-CAT-1 nanostructured thin films after immersion in an acidic (hydrochloric acid) aqua solution (pH 5, 12 h), in basic (sodium hydroxide) aqua solution (pH 9, 12 h), exposure to high temperatures (150 °C, 12 h), and mechanical impact (sonication in a water bath, 20 min), respectively.

## Co-CAT-1 oriented and nanostructured films on gold substrates

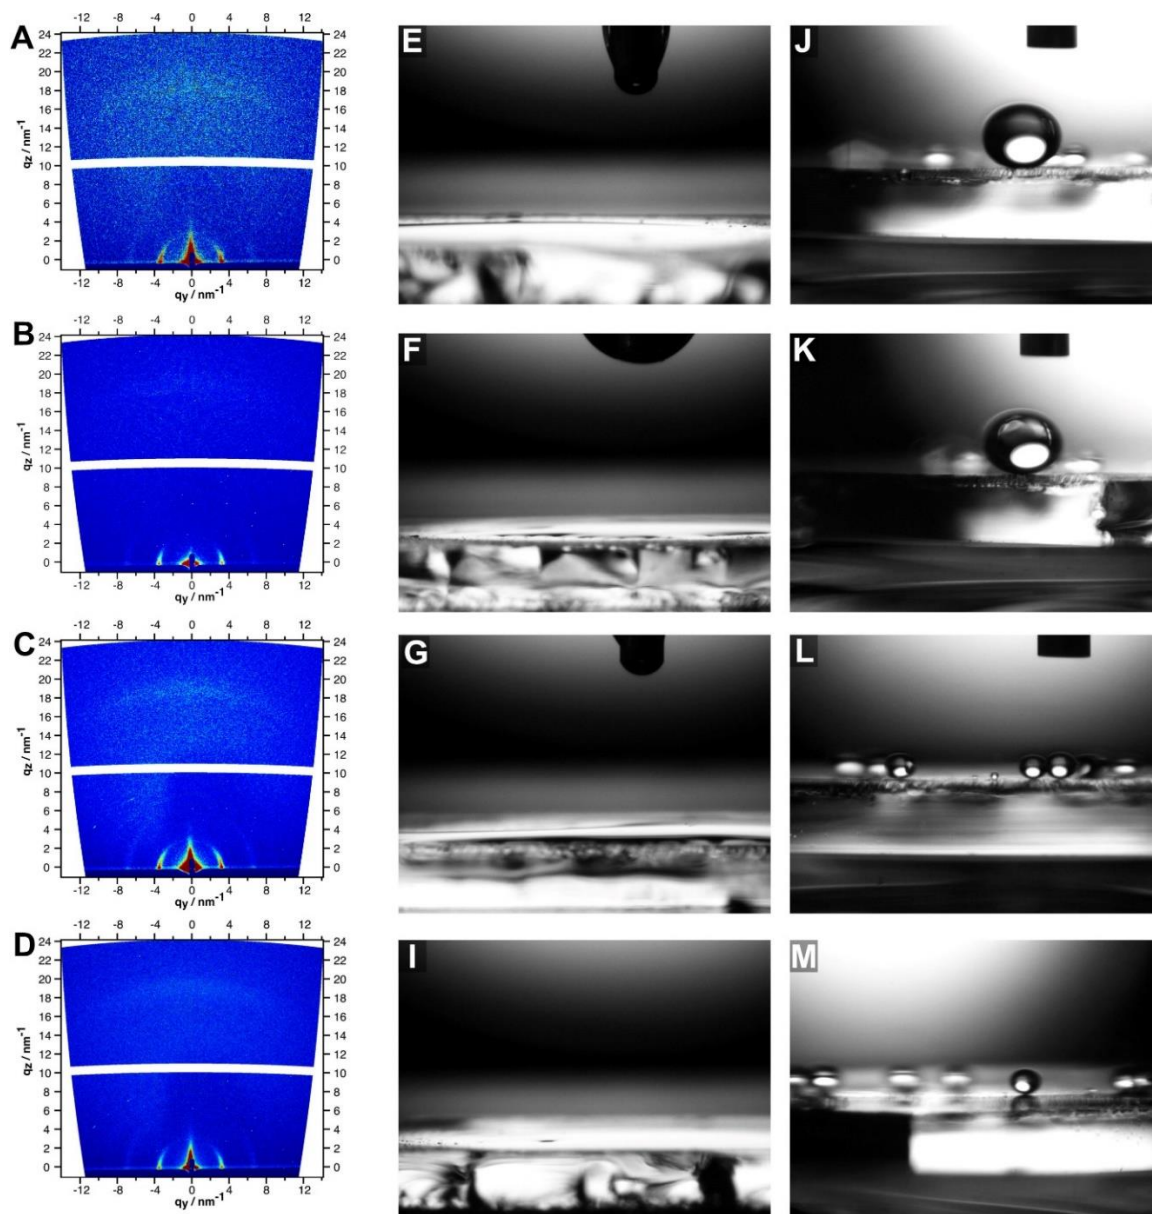

**Figure S8.2** A), B), C) and D) GIWAXS patterns of nanostructured Co-CAT-1 thin films on gold substrates after immersion in an acidic (hydrochloric acid) aqua solution (pH 5, 12 h), basic (sodium hydroxide) aqua solution (pH 9, 12 h), exposure to high temperatures (150 °C, 12 h), and mechanical impact (sonication in a water bath, 20 min), respectively. E), F), G) and H) WCA of Co-CAT-1 nanostructured thin films after immersion in an acidic (hydrochloric acid) aqua solution (pH 5, 12 h), basic (sodium hydroxide) aqua solution (pH 9, 12 h), exposure to high temperatures (150 °C, 12 h), and mechanical impact (sonication in a water bath, 20min), respectively. J), K), L) and M) OCA of Co-CAT-1 nanostructured thin films after immersion in an acidic (hydrochloric acid) aqua solution (pH 5, 12 h), basic (sodium hydroxide) aqua solution (pH 9, 12 h), exposure to high temperatures (150 °C, 12 h), and mechanical impact (sonication in a water bath, 20 min), respectively.



## Nanostructured Ni-CAT-1 films on glass substrates

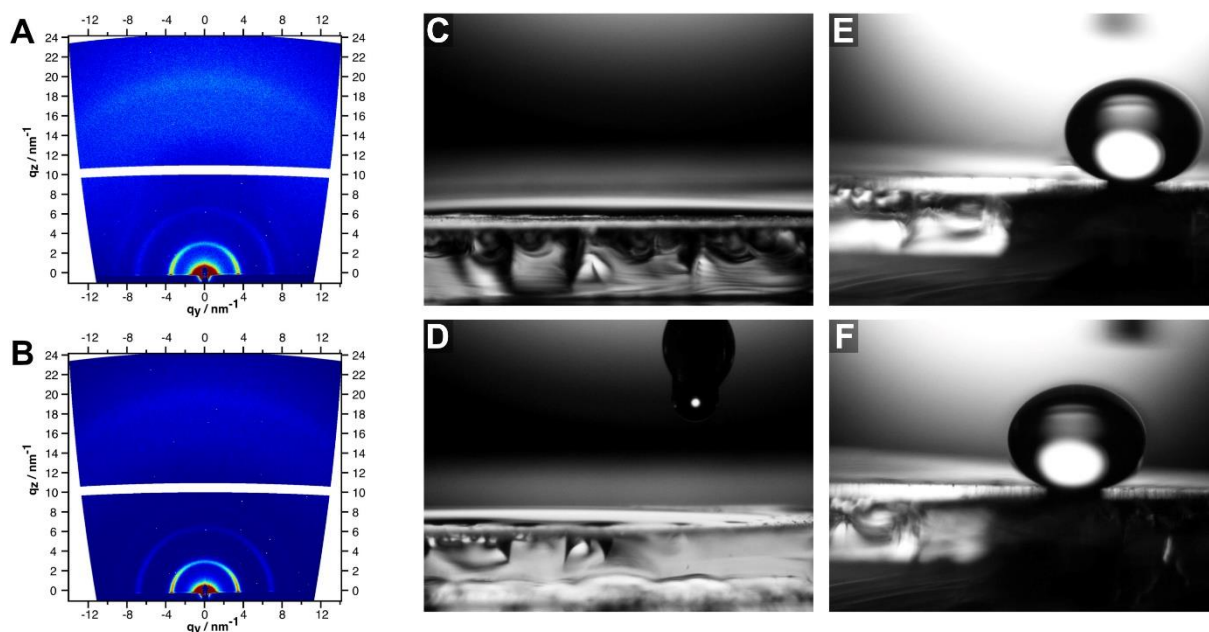

**Figure S8.3** A), B) GIWAXS patterns of nanostructured Ni-CAT-1 thin films grown on gold substrates after immersion in an acidic (hydrochloric acid) aqua solution (pH 5, 12 h) and exposure to high temperatures (150°C, 12 h), respectively. C), D) WCA of Ni-CAT-1 nanostructured thin films after immersion in an acidic (hydrochloric acid) aqua solution (pH 5, 12 h) and exposure to high temperatures (150 °C, 12 h), respectively. E) and F) OCA of Ni-CAT-1 nanostructured thin films after immersion in acidic (hydrochloric acid) aqua solution (pH 5, 12 h) and exposure to high temperatures (150°C, 12h), respectively.

## References

- S1. Mähringer, A.; Jakowetz, A. C.; Rotter, J. M.; Bohn, B. J.; Stolarczyk, J. K.; Feldmann, J.; Bein, T.; Medina, D. D. *ACS Nano* **2019**, *13*, 6711–6719.
